# Supplementary material
Source: PubMed Central journal article supplement (PMC9691555)
Supplement: NIHMS1831430-supplement-supinfo.pdf [file NIHMS1831430-supplement-supinfo.pdf]

Table S1 Participants' characteristics and pregnancy outcomes during the original HAPO study, and children's characteristics and cardiovascular risk factors during the HAPO follow-up study

|                                                        | n=926            |
|--------------------------------------------------------|------------------|
| Paternal BMI during pregnancy (kg/m <sup>2</sup> )     | 22.9 (20.9-25.1) |
| Maternal characteristics and outcomes during pregnancy |                  |
| Age (years)                                            | 31.5 (28.1-34.4) |
| Gestational age (weeks)                                | 39.6 (38.7-40.4) |
| Pre-pregnancy BMI (kg/m <sup>2</sup> )                 | 20.3 (19.0-22.3) |
| Gestational weight gain (kg)                           | 15.1 (12.4-18.0) |
| Below IOM recommendations                              | 157 (17.3)       |
| Within IOM recommendations                             | 371 (40.9)       |
| Exceeding IOM recommendations                          | 379 (41.8)       |
| Nulliparity                                            | 547 (59.1)       |
| Gestational hypertension / preeclampsia                | 16 (1.7)         |
| Smoker                                                 | 14 (1.5)         |
| GDM                                                    | 132 (14.3)       |
| Newborn anthropometrics                                |                  |
| Birth weight (g)                                       | 3198 (2950-3490) |
| Body length (cm)                                       | 49.4 (48.2-50.4) |
| Ponderal index (kg/m <sup>3</sup> )                    | 26.9 (25.4-28.4) |
| Suprailiac skin fold (mm)                              | 3.1 (2.6-3.6)    |
| Triceps skin fold (mm)                                 | 4.4 (3.8-4.9)    |
| Subscapular skin fold (mm)                             | 4.2 (3.6-4.8)    |
| Sum of skinfolds (mm)                                  | 11.7 (10.4-13.3) |
| Children's characteristics                             |                  |
| Age (years)                                            | 6.9 (6.7-7.2)    |
| Sex (male)                                             | 482 (52.1)       |
| Exercise level                                         |                  |
| No exercise                                            | 91 (9.8)         |
| Mild exercise                                          | 489 (53.0)       |
| Vigorous exercise                                      | 343 (37.2)       |

Childhood cardiovascular risk factors

*Adiposity traits*

|                          |                  |
|--------------------------|------------------|
| Body weight (kg)         | 22.4 (20.2-25.3) |
| BMI (kg/m <sup>2</sup> ) | 14.5 (13.6-15.9) |
| BMI percentile           | 38.4 (16.0-68.6) |
| Waist circumference (cm) | 53.0 (50.0-57.0) |
| Waist-hip ratio          | 0.84 (0.81-0.86) |
| Sum of skinfolds (mm)    | 30.5 (25.2-40.1) |

*Blood pressure and arterial stiffness*

|                                           |                    |
|-------------------------------------------|--------------------|
| Systolic BP (mmHg)                        | 101.7 (95.7-107.7) |
| Diastolic BP (mmHg)                       | 61.3 (56.3-66.7)   |
| Systolic BP percentile                    | 62.8 (43.1-80.5)   |
| Diastolic BP percentile                   | 60.9 (44.9-77.8)   |
| Carotid-femoral pulse wave velocity (m/s) | 4.7 (4.3-5.2)      |

---

Data are expressed as median (IQR) or n (%).

HAPO, Hyperglycemia and Adverse Pregnancy Outcomes; IOM, Institute of Medicine.

Table S2 Associations between newborn anthropometrics z-score and childhood cardiovascular risk factors z-score by sex

|                                                        | Male<br>N =483          |        | Female<br>N =443      |        |
|--------------------------------------------------------|-------------------------|--------|-----------------------|--------|
|                                                        | $\beta$ (95% CI)        | P      | $\beta$ (95% CI)      | P      |
| <b>Childhood anthropometrics</b>                       |                         |        |                       |        |
| <i>Birth weight</i>                                    |                         |        |                       |        |
| Body weight                                            | 0.17 (0.07 to 0.26)     | <0.001 | 0.24 (0.15 to 0.34)   | <0.001 |
| BMI percentile $\Delta$                                | 0.13 (0.03 to 0.22)     | 0.011  | 0.22 (0.12 to 0.32)   | <0.001 |
| WC                                                     | 0.07 (-0.03 to 0.16)    | 0.151  | 0.17 (0.07 to 0.27)   | 0.001  |
| WHR                                                    | -0.01 (-0.11 to 0.08)   | 0.796  | -0.03 (-0.14 to 0.07) | 0.527  |
| SSF                                                    | 0.05 (-0.05 to 0.16)    | 0.331  | 0.04 (-0.05 to 0.14)  | 0.387  |
| <i>Newborn PI</i>                                      |                         |        |                       |        |
| Body weight                                            | 0.06 (-0.02 to 0.15)    | 0.154  | 0.1 (0.007 to 0.19)   | 0.036  |
| BMI percentile $\Delta$                                | 0.17 (0.08 to 0.27)     | <0.001 | 0.15 (0.05 to 0.25)   | 0.002  |
| WC                                                     | 0.09 (-0.003 to 0.18)   | 0.059  | 0.06 (-0.04 to 0.15)  | 0.240  |
| WHR                                                    | 0.14 (0.05 to 0.23)     | 0.003  | 0.06 (-0.04 to 0.16)  | 0.221  |
| SSF                                                    | 0.09 (-0.009 to 0.2)    | 0.074  | 0.02 (-0.07 to 0.1)   | 0.719  |
| <i>Newborn SSF</i>                                     |                         |        |                       |        |
| Body weight                                            | 0.01 (-0.09 to 0.11)    | 0.802  | 0.06 (-0.03 to 0.15)  | 0.182  |
| BMI percentile $\Delta$                                | 0.07 (-0.04 to 0.17)    | 0.193  | 0.1 (0.005 to 0.2)    | 0.040  |
| WC                                                     | -0.02 (-0.12 to 0.08)   | 0.720  | 0.11 (0.01 to 0.2)    | 0.024  |
| WHR                                                    | -0.05 (-0.15 to 0.05)   | 0.329  | 0.05 (-0.04 to 0.15)  | 0.272  |
| SSF                                                    | 0.14 (0.02 to 0.25)     | 0.019  | 0.09 (0.004 to 0.18)  | 0.041  |
| <b>Childhood blood pressure and arterial stiffness</b> |                         |        |                       |        |
| <i>Birth weight</i>                                    |                         |        |                       |        |
| SBP percentile $\Delta$                                | -0.11 (-0.21 to -0.007) | 0.036  | -0.01 (-0.12 to 0.09) | 0.826  |
| DBP percentile $\Delta$                                | -0.03 (-0.13 to 0.07)   | 0.588  | 0.01 (-0.09 to 0.11)  | 0.829  |
| cfPWV $\nabla$                                         | -0.008 (-0.11 to 0.09)  | 0.870  | 0.04 (-0.07 to 0.15)  | 0.456  |
| <i>Newborn PI</i>                                      |                         |        |                       |        |
| SBP percentile $\Delta$                                | -0.09 (-0.19 to 0.003)  | 0.057  | -0.07 (-0.17 to 0.03) | 0.164  |
| DBP percentile $\Delta$                                | -0.04 (-0.13 to 0.05)   | 0.408  | -0.11 (-0.2 to -0.01) | 0.026  |
| cfPWV $\nabla$                                         | -0.09 (-0.18 to 0.01)   | 0.079  | -0.1 (-0.2 to -0.003) | 0.044  |
| <i>Newborn SSF</i>                                     |                         |        |                       |        |
| SBP percentile $\Delta$                                | 0.02 (-0.09 to 0.13)    | 0.686  | 0.09 (-0.004 to 0.19) | 0.059  |
| DBP percentile $\Delta$                                | 0.11 (0.008 to 0.22)    | 0.035  | 0.13 (0.04 to 0.23)   | 0.005  |
| cfPWV $\nabla$                                         | 0.03 (-0.07 to 0.14)    | 0.527  | 0.11 (0.01 to 0.21)   | 0.026  |

Childhood cardiovascular risk factors were adjusted for gestational age at birth, child's age and exercise level, except for  $\nabla$  was further adjusted for child's height,  $\Delta$  were calculated according to sex-, age- and/or height-specific references.

CI, confidence interval; PI, Ponderal index; SSF, sum of skinfolds; BMI, body mass index; WC, waist circumference; WHR, waist-hip ratio; SBP, systolic blood pressure; DBP, diastolic blood pressure; cfPWV, carotid-femoral pulse wave velocity.

Table S3 Associations of maternal GWG with newborn anthropometrics z-score and childhood cardiovascular risk factors z-score

|                                                         | Maternal GWG below IOM |        | Maternal GWG exceeding IOM |        |
|---------------------------------------------------------|------------------------|--------|----------------------------|--------|
|                                                         | $\beta$ (95% CI)       | P      | $\beta$ (95% CI)           | P      |
| <b>Newborn anthropometrics (mediators)</b>              |                        |        |                            |        |
| Birth weight                                            | -0.29 (-0.45 to -0.12) | <0.001 | 0.31 (0.18 to 0.43)        | <0.001 |
| PI                                                      | -0.27 (-0.47 to -0.07) | 0.007  | 0.22 (0.07 to 0.37)        | 0.004  |
| SSF                                                     | -0.30 (-0.49 to -0.12) | 0.001  | 0.22 (0.08 to 0.36)        | 0.003  |
| <b>Childhood cardiovascular risk factors (outcomes)</b> |                        |        |                            |        |
| <i>Anthropometrics</i>                                  |                        |        |                            |        |
| Body weight                                             | 0.07 (-0.11 to 0.26)   | 0.445  | 0.36 (0.22 to 0.50)        | <0.001 |
| BMI Percentile                                          | -0.01 (-0.20 to 0.18)  | 0.913  | 0.34 (0.19 to 0.49)        | <0.001 |
| SSF                                                     | 0.04 (-0.15 to 0.23)   | 0.676  | 0.23 (0.08 to 0.37)        | 0.002  |
| <i>Blood pressure and arterial stiffness</i>            |                        |        |                            |        |
| SBP percentile                                          | 0.04 (-0.15 to 0.24)   | 0.652  | 0.16 (0.02 to 0.31)        | 0.027  |
| DBP percentile                                          | 0.19 (-0.002 to 0.38)  | 0.053  | 0.23 (0.09 to 0.38)        | 0.002  |
| cfPWV (m/s)                                             | -0.02 (-0.22 to 0.18)  | 0.832  | 0.11 (-0.04 to 0.26)       | 0.167  |

Data are expressed as  $\beta$  (95% CI).

Children of mothers obtaining GWG below (n =157) or exceeding (n =371) the IOM recommendations were compared with children of mothers obtaining GWG within (n =379) the recommendations, respectively. Newborn anthropometrics were adjusted for gestational age at birth, paternal BMI, maternal age, parity, gestational hypertension/preeclampsia, smoking status and glycemic status in pregnancy and child's sex. Childhood cardiovascular risk factors were adjusted for covariates mentioned above plus child's age and exercise level.

GWG, gestational weight gain; IOM, Institute of Medicine; CI, confidence interval; PI, Ponderal index; SSF, sum of skinfolds; (1)DV, dependent variable; BMI, body mass index; SBP, systolic blood pressure; DBP, diastolic blood pressure; cfPWV, carotid-femoral pulse wave velocity.

Figure S1 Flow chart

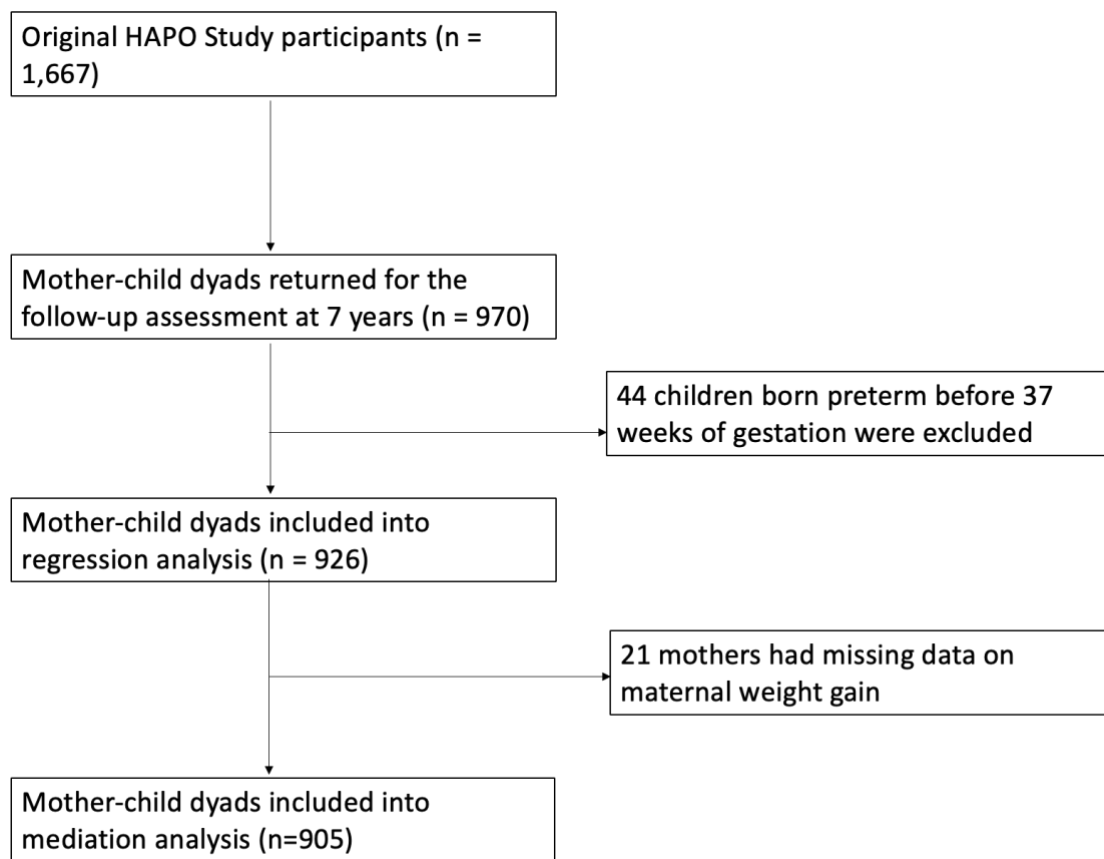

Figure S2 Causal mediation analysis of maternal GWG with childhood cardiovascular risk factors mediated by newborn anthropometrics

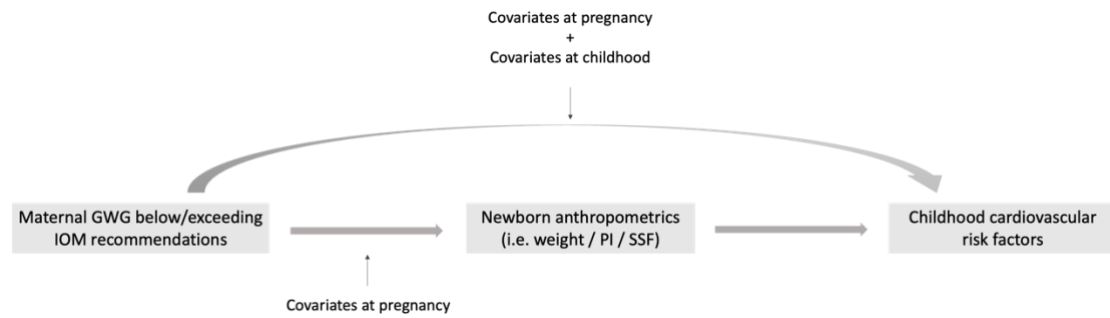

Children of mothers obtaining GWG below or exceeding the IOM recommendations were compared with children of mothers obtaining GWG within the recommendations, respectively.

Covariates at pregnancy included gestational age at birth, paternal BMI; maternal age, parity, gestational hypertension/preeclampsia, smoking status and glycemic status at pregnancy and child's sex.

Covariates at childhood included child's age and exercise level.

GWG, gestational weight gain; IOM, Institute of Medicine; PI, Ponderal index; SSF, sum of skinfold.
